# Supplementary material
Source: PubMed Central journal article supplement (PMC8974349)
Supplement: glab150_suppl_supplementary_materials.pdf [file glab150_suppl_supplementary_materials.pdf]

**Supplemental Table 1: Brain regions of interest and their associations with self-reported energy/fatigue and/or Mild Parkinsonian Signs**

| Regions of Interest       | Energy     | MPS        | References (Energy)                                                  | References (MPS)                                                   |
|---------------------------|------------|------------|----------------------------------------------------------------------|--------------------------------------------------------------------|
| Basal ganglia             | ✓✓✓✓       | ✓ ✗        | <u>Chaudhuri, 2000; Li, 2017; Wasson, 2019; Chaudhuri, 2004</u>      | Camarda, 2018; Rosano, 2012                                        |
| Caudate                   | ✓ ✗        | ✓          | Kluger, 2019; Niccolini, 2019                                        | Camarda, 2018                                                      |
| Putamen                   | ✓<br>✓ ✗ ✓ |            | <u>Kluger, 2019 ; Tessitore, 2016; Niccolini, 2019; Wasson, 2019</u> |                                                                    |
| Prefrontal cortex         | ✓ ✗<br>✓ ✓ | ✓ ✓        | Li, 2017; Kluger, 2019; Tessitore, 2016; Carvalho, 2017              | Camarda, 2018 ; de Laat, 2012; Rosano, 2008                        |
| Motor cortex              | ✓          | ✓ ✓        | Li, 2017                                                             | Rosano, 2012; Rosano, 2008                                         |
| Substantia nigra          | ✓          | ✓ ✓ ✓<br>✓ | Solupchuk, 2018                                                      | <u>Mahlknecht, 2020 ; Lerche, 2015 ; Buchman, 2012; Ross, 2004</u> |
| Hippocampus               | ✗ ✗ ✓ ✓    | ✗ ✓        | Niccolini, 2019; Kang 2020; Wasson, 2019; Carvalho, 2017             | Louis, 2008                                                        |
| Cingulate cortex          | ✗ ✗ ✓      |            | Li, 2017; Kluger, 2019; Tessitore, 2016                              |                                                                    |
| Thalamus                  | ✓ ✓ ✓      | ✗          | Chaudhuri, 2004; Niccolini, 2019; Kang 2020                          | Rosano, 2012                                                       |
| Insula                    | ✗          |            | Kluger, 2019                                                         |                                                                    |
| Amygdala                  | ✗ ✓        |            | Niccolini, 2019; Wasson, 2019                                        |                                                                    |
| Nucleus accumbens         | ✗          |            | Niccolini, 2019                                                      |                                                                    |
| Pre and post central gyri | ✓          | ✓          | Li, 2017                                                             | Rosano, 2012                                                       |
| Limbic system             | ✓ ✓        | ✓          | Chaudhuri, 2004; Wasson, 2019                                        | Rosano, 2012                                                       |

**Supplementary Table 2. Associations of the slope of energy with MPS in those free of dementia**

(n=278)

|                       | <b>Model 1:<br/>unadjusted</b>        | <b>Model 2:<br/>Adjusted<br/>for age</b> | <b>Model 3:<br/>Model 2 +<br/>fatigue</b> | <b>Model 4:<br/>Model 3 +<br/>Baseline<br/>SEL</b> | <b>Model 5:<br/>Model 4 +<br/>WMH</b> | <b>Model 6:<br/>Model<br/>5+right<br/>striatum+<br/>normalized<br/>total gray<br/>matter<br/>volume</b> | <b>Model 7:<br/>model 6 +<br/>disease<br/>conditions<br/>affecting<br/>MPS</b> |
|-----------------------|---------------------------------------|------------------------------------------|-------------------------------------------|----------------------------------------------------|---------------------------------------|---------------------------------------------------------------------------------------------------------|--------------------------------------------------------------------------------|
|                       | <b>Unadjusted<br/>OR<br/>(95% CI)</b> | <b>Adjusted OR (95% CI)</b>              |                                           |                                                    |                                       |                                                                                                         |                                                                                |
| <b>SEL<br/>slopes</b> | 2.04<br>(1.23, 3.39)                  | 2.03<br>(1.22, 3.38)                     | 1.88<br>(1.11, 3.17)                      | 1.88<br>(1.12, 3.16)                               | 1.92<br>(1.13, 3.24)                  | 2.11<br>(1.23, 3.63)                                                                                    | 2.17<br>(1.25, 3.77)                                                           |

Note. SEL=self-reported energy level. WMH=white matter hyperintensities. Model 2-7 adjusted for covariates that were bivariately associated with MPS (i.e. age; refer to Table 1). In model 7, diseases included the prevalence of cardiovascular disease, stroke, myocardial infarction, and diabetes. Due to small values, the slope of energy was multiplied by 10 for interpretation purposes. The sign of slope was reversed with higher values indicating a greater decline in SEL
